# Supplementary material
Source: publisher figshare collection journal article supplement (https://karger.figshare.com/ndownloader/files/9273121)

**Supplementary Figure 1. Conversion of PSP to dementia during follow-up.** The group PSP-Converters indicate the patients who developed dementia during the follow-up while “PSP-Stable” indicates the group of patients without dementia after three years of follow-up. Red indicates patients with behavioral variant frontotemporal dementia (bvFTD), in purple have been highlighted the two patients who developed dementia characterised by multi-domain impairment with no major behavioural impairment **Abbreviations:** PSP, Progressive Supranuclear Palsy; NC, normal cognition; MCI, mild cognitive impairment; D, dementia.


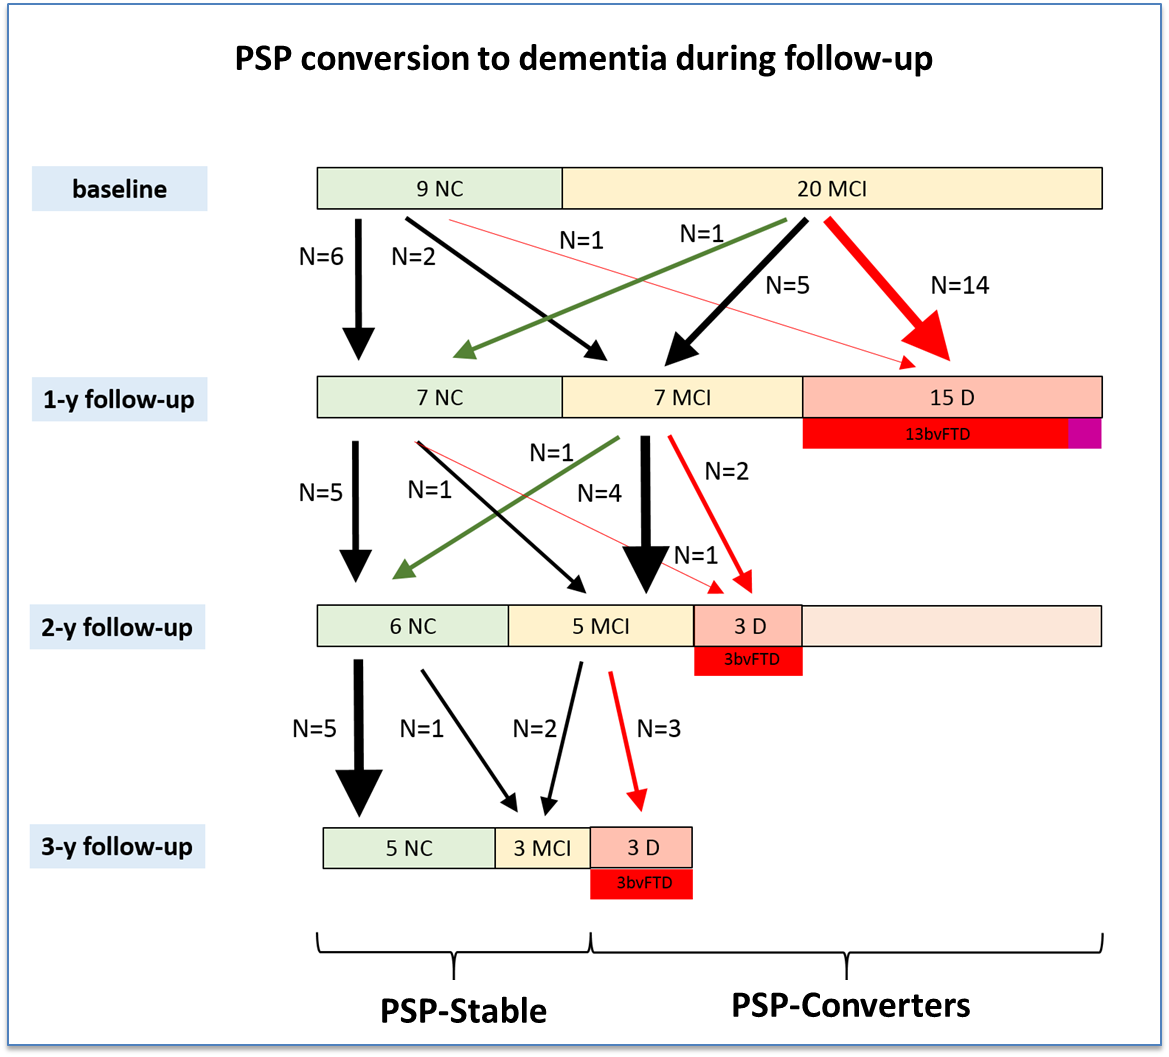

Supplement: Supplementary file 1 [file 9273121]
